# Supplementary material
Source: HighWire-hosted journal article supplement (https://bmjleader.bmj.com/highwire/filestream/2089/field_highwire_adjunct_files/0/leader-2021-000518supp001_data_supplement.pdf)
Supplement: leader-2021-000518supp001_data_supplement.pdf [file leader-2021-000518supp001_data_supplement.pdf]

Supplementary table: Correlation of moral injury and wellbeing scores

|                                              | How troubled by own actions score | How troubled by other people's actions score | Physical wellbeing score | Mental wellbeing score | Connectedness with colleagues score | Connectedness with people outside work score |
|----------------------------------------------|-----------------------------------|----------------------------------------------|--------------------------|------------------------|-------------------------------------|----------------------------------------------|
| How troubled by own actions score            | 1                                 |                                              |                          |                        |                                     |                                              |
| How troubled by other people's actions score | 0.4091*<br>(p<0.0001)             | 1                                            |                          |                        |                                     |                                              |
| Physical wellbeing score                     | -0.1428*<br>(p=0.0008)            | -0.2228*<br>(p<0.0001)                       | 1                        |                        |                                     |                                              |
| Mental wellbeing score                       | -0.2436*<br>(p<0.0001)            | -0.3276*<br>(p<0.0001)                       | 0.5496*<br>(p<0.0001)    | 1                      |                                     |                                              |
| Connectedness with colleagues score          | -0.0947*<br>(p=0.0275)            | -0.1022*<br>(p=0.0165)                       | 0.2496*<br>(p<0.0001)    | 0.3359*<br>(p<0.0001)  | 1                                   |                                              |
| Connectedness with people outside work score | -0.0733<br>(p=0.0869)             | -0.1144*<br>(p=0.0070)                       | 0.1914*<br>(p<0.0001)    | 0.2771*<br>(p<0.0001)  | 0.2301*<br>(p<0.0001)               | 1                                            |
